# Supplementary material
Source: Springer Nature journal article supplement (https://www.springermedizin.de/resource/supplementary/13000_2009_207_MOESM1_ESM.pdf/9624162)
Supplement: MOESM1 [file 9624162]

**A****Frozen lungs (2.5 yr)**

Lung 1   Lung 2   Lung 3

tissue's pool

90 mg / 1.8 ml  
lyses buffer90 mg / 1.8 ml  
lyses buffer

3X 0.6 ml

1   2   3

**Method 1: SGC**

3X 0.6 ml

1   2   3

**Method 2: GTC****B****Fresh lungs (0 yr)**

Lung 1   Lung 2   Lung 3

tissue's pool

90 mg / 1.8 ml  
lyses buffer90 mg / 1.8 ml  
lyses buffer

3X 0.6 ml

1   2   3

**Method 1: SGC**

3X 0.6 ml

1   2   3

**Method 2: GTC**
